# Supplementary material
Source: MDPI journal article supplement (https://www.mdpi.com/2504-446X/6/3/70)

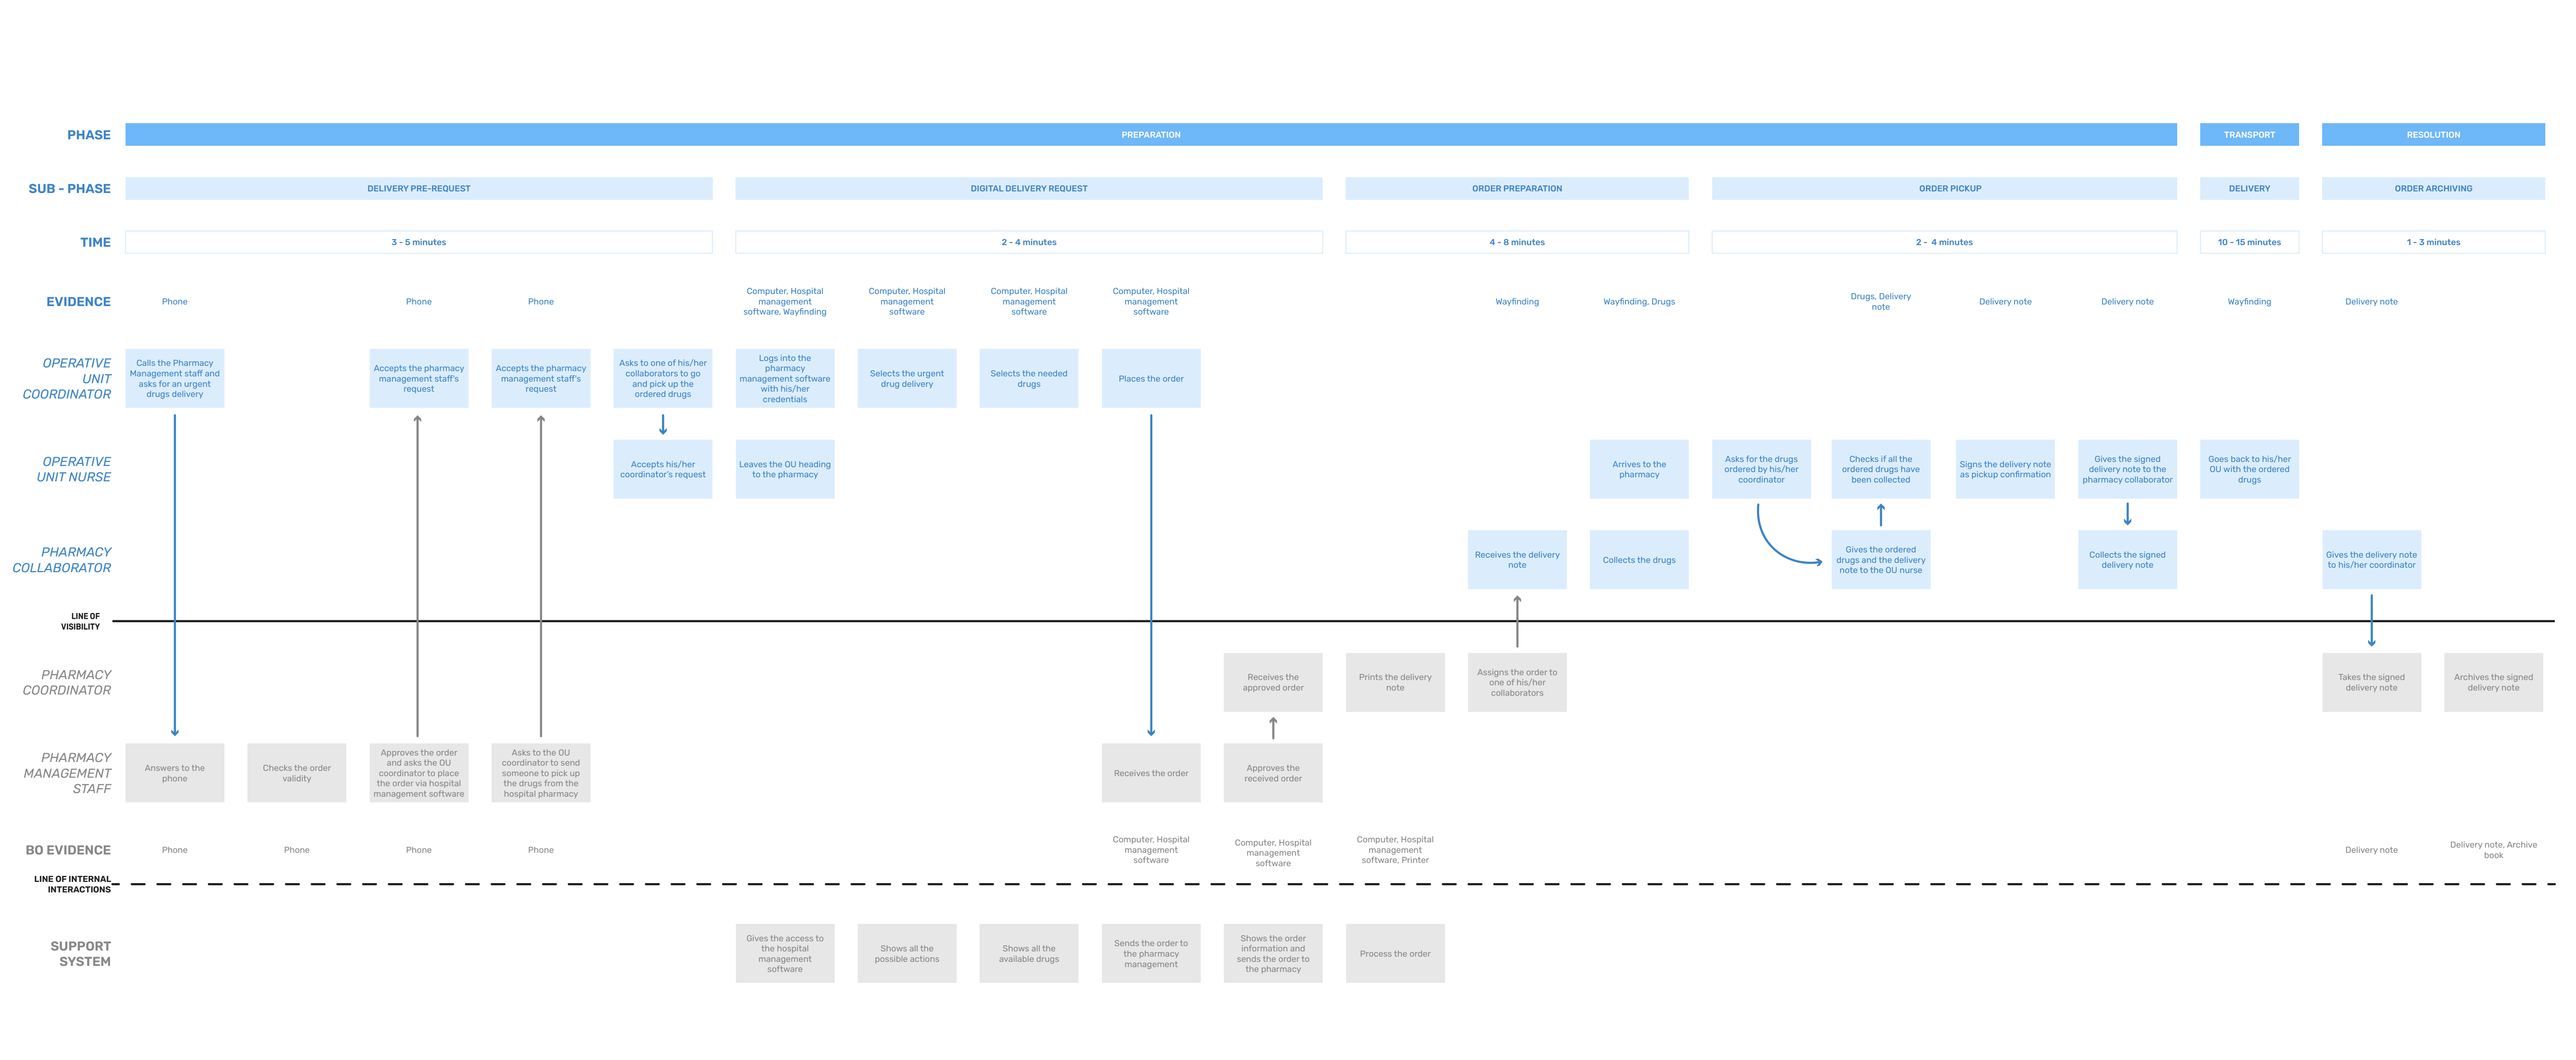

Supplement: s1 [file s1 › Figure S1 - Healthcare logistics blueprint of the as is scenario.pdf]

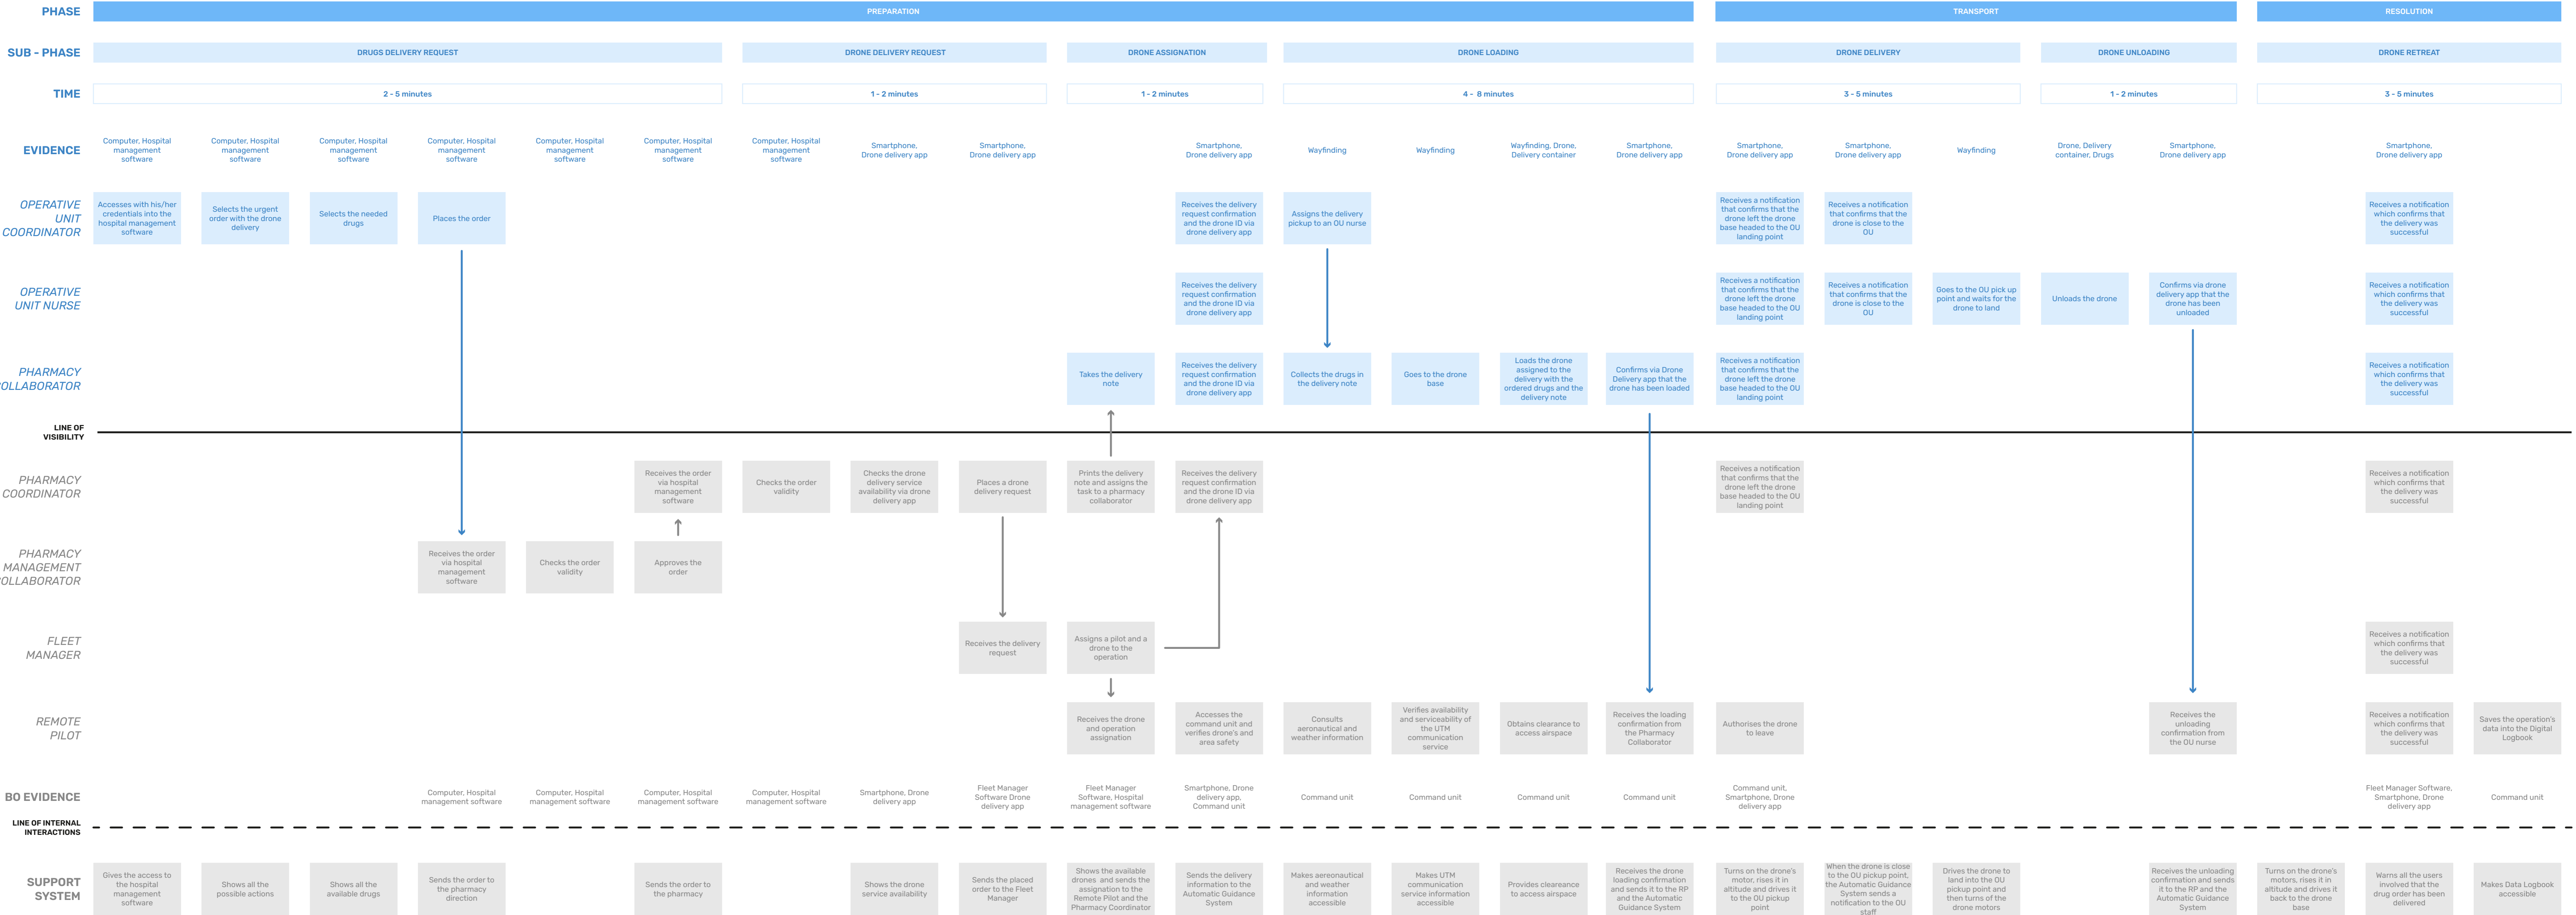

Supplement: s1 [file s1 › Figure S2 - Healthcare logistics blueprint of the aspirational scenario.pdf]

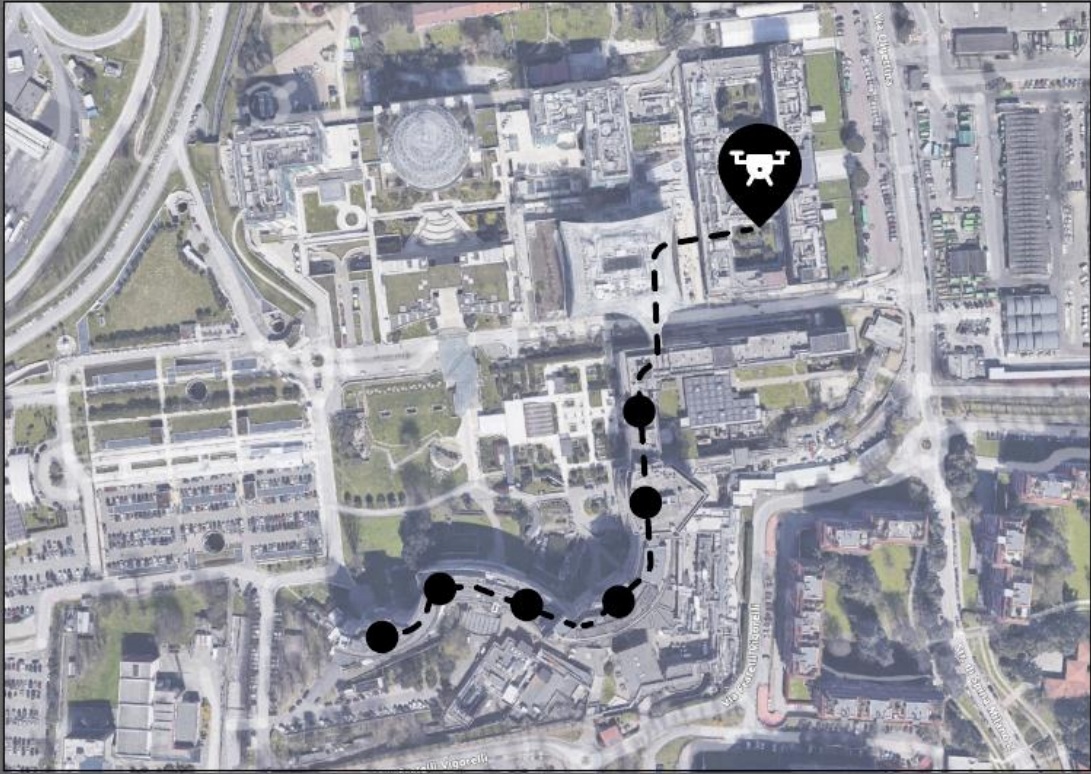

Supplement: s1 [file s1 › Figure S3 - Flight path for the transport of pharmaceuticals by drones in San Raffaele Hospital (Milan, IT).pdf]
